# Supplementary material
Source: ML conference proceedings conference paper supplement (https://proceedings.neurips.cc/paper_files/paper/2022/hash/940f8a526b8b36f110265f4b6059d81b-Abstract.html)
Supplement: Supplementary file 1 [file 940f8a526b8b36f110265f4b6059d81b-Supplemental-Conference.zip]

Archive with 3 entries (3 files):
- appendix.pdf
- __MACOSX/._appendix.pdf
- code.zip
